# Supplementary material for: Nickel on Oxidatively Modified Carbon as a Promising Cost-Efficient Catalyst for Reduction of P-Nitrophenol
Source: MDPI journal article supplement (doi:10.3390/molecules27175637), 2022-09-01
Supplement: s1 [file s1]

Supplementary Information for

**Nickel on Oxidatively Modified Carbon as a Promising  
Cost-Efficient Catalyst for Reduction of *P*-Nitrophenol**

Shamil Galyaltdinov <sup>1</sup>, Anna Svalova <sup>1</sup>, Vasiliy Brusko <sup>1</sup>, Maria Kirsanova <sup>2</sup> and Ayrat M. Dimiev <sup>1,\*</sup>

<sup>1</sup> Laboratory for Advanced Carbon Nanomaterials, Chemical Institute, Kazan Federal University, Kremlyovskaya Str. 18, 420008 Kazan, Russia

<sup>2</sup> Advanced Imaging Core Facility, Skolkovo Institute of Science and Technology, 121205 Moscow, Russia

\* Correspondence: [amdimiev@kpfu.ru](mailto:amdimiev@kpfu.ru)

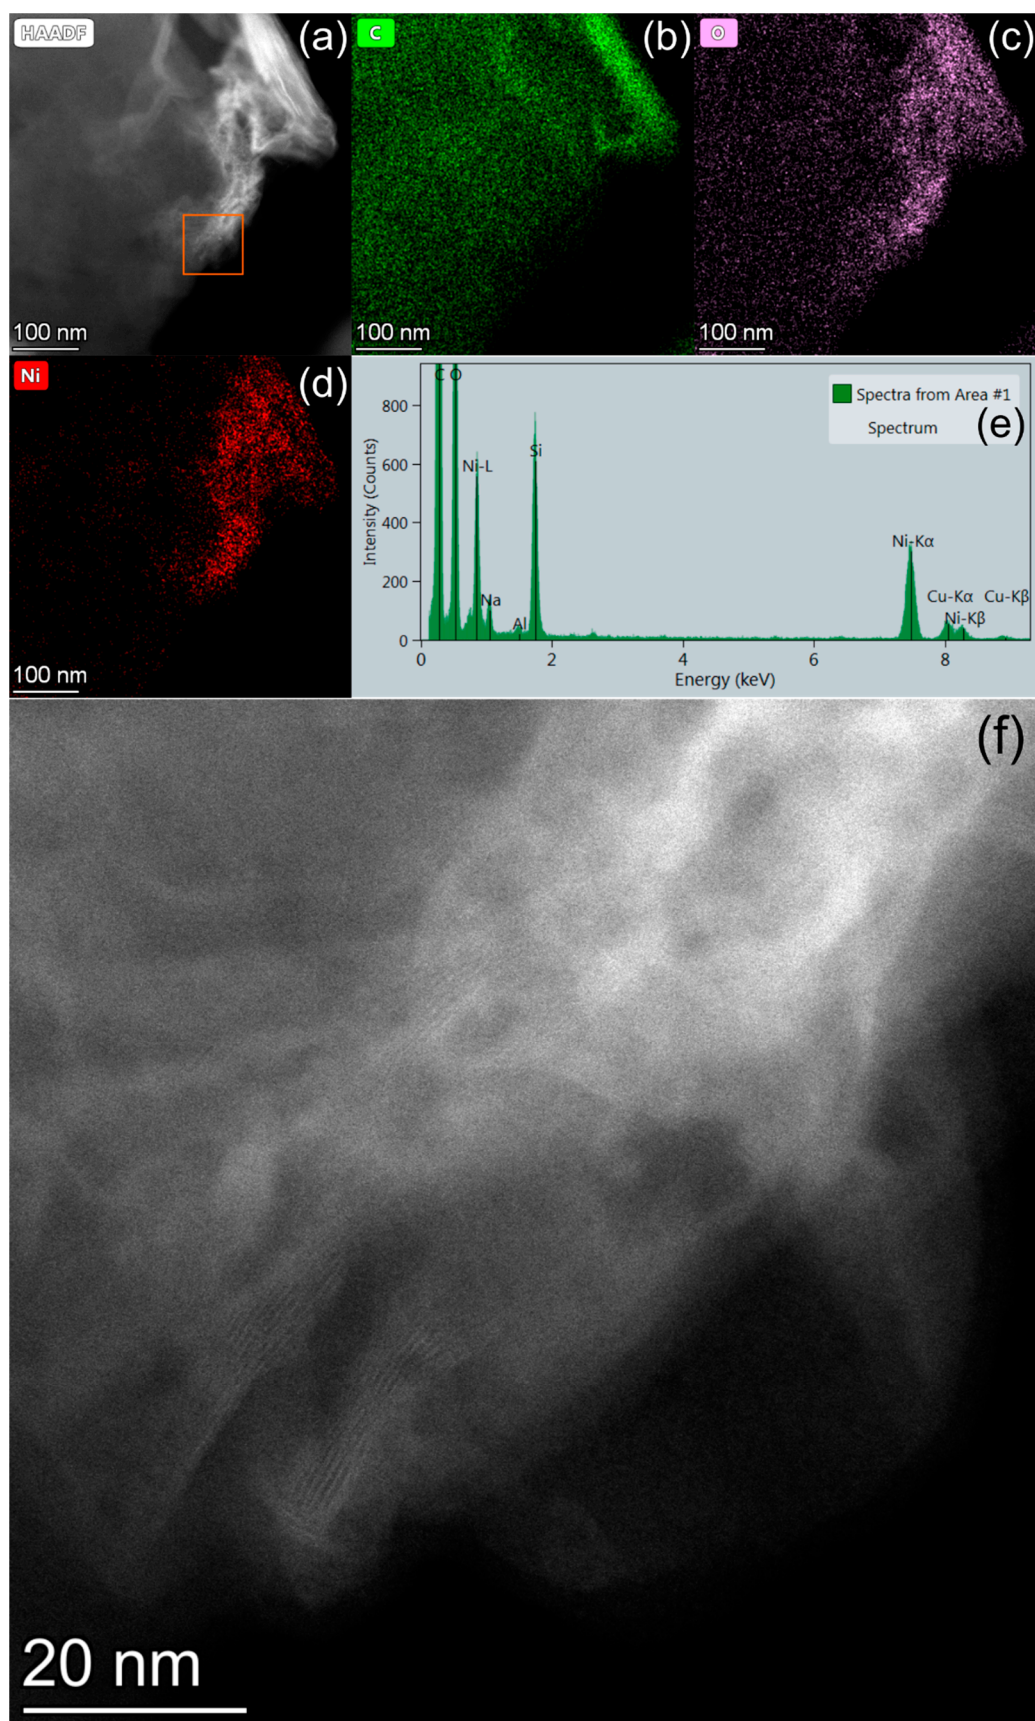

**Figure S1.** The EDX mapping of a selected area of an rOMC/Ni particle. (a) the HAADF image; (b) – (d) the mapping for C, O, and Ni; (e) the spectrum; (f) the higher magnification image from the area shown by yellow square on panel (a).

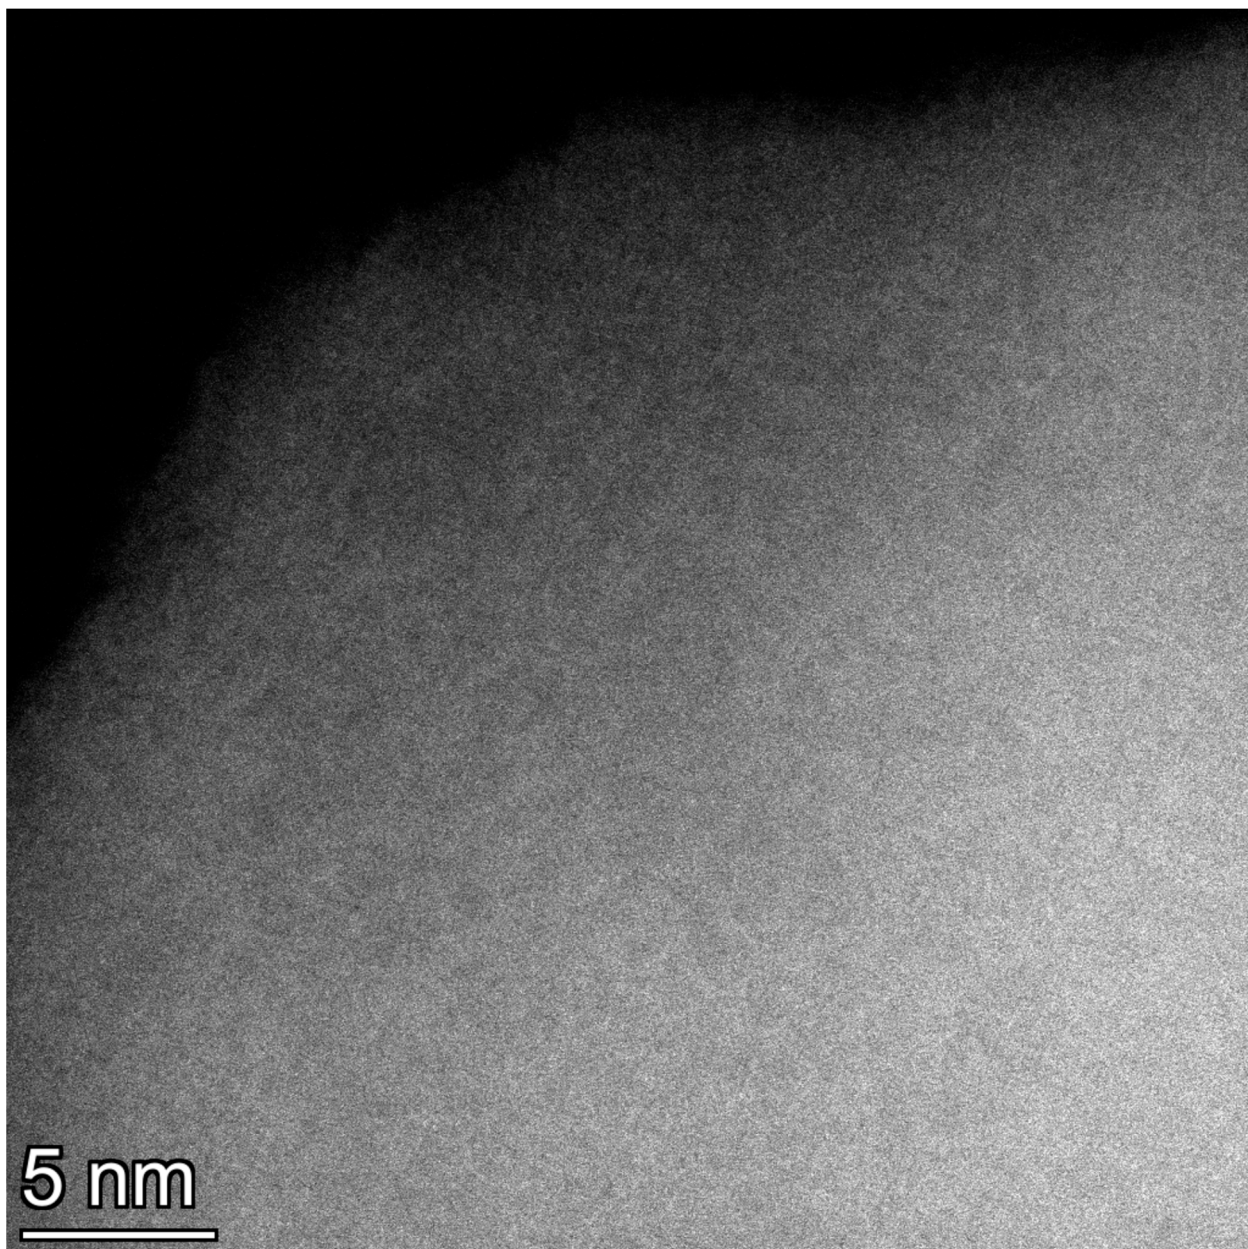

**Figure S2.** The high magnification HAADF-STEM image from the selected area of the rOMC/Ni sample.

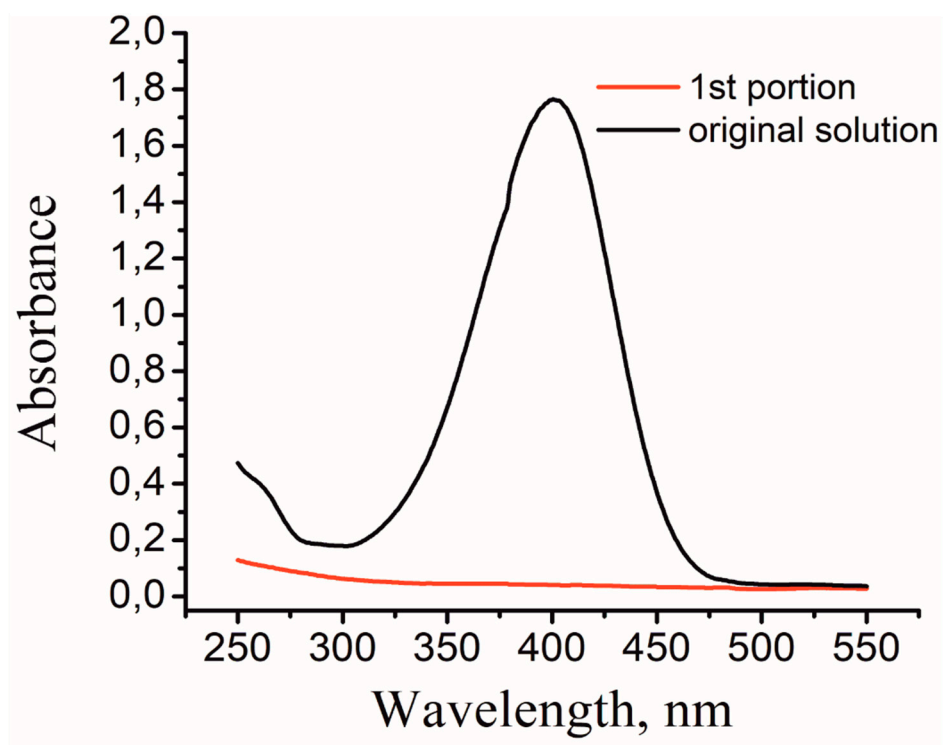

**Figure S3.** The UV-Vis spectra of the original **mixture 1** and the first portion of its reduction product.

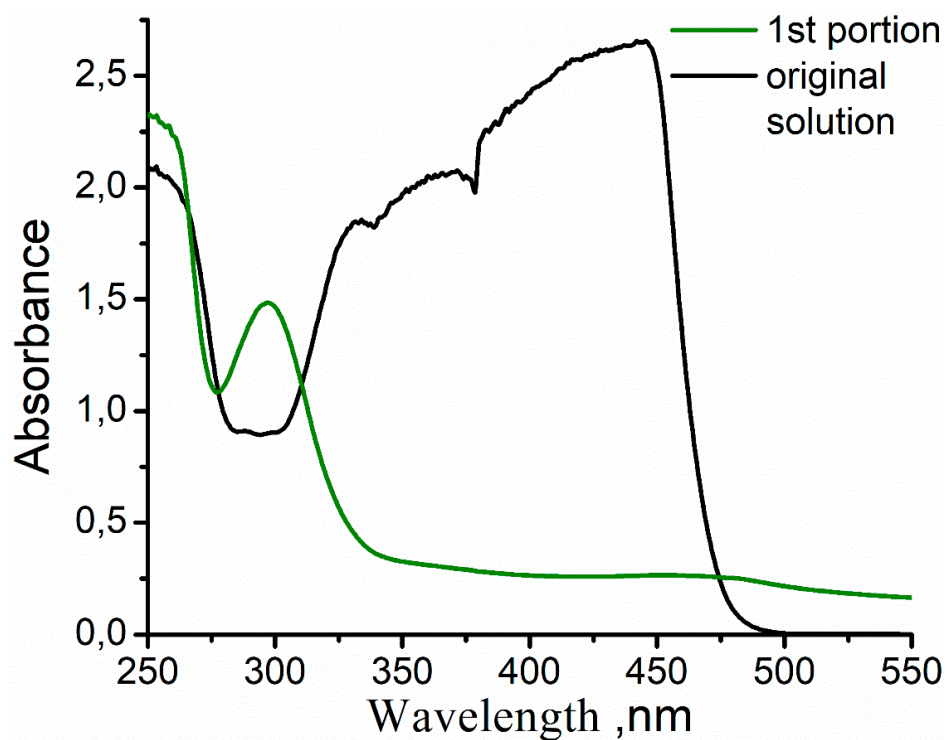

**Figure S4.** The UV-Vis spectra of the original **mixture 2** and the first portion of its reduction product.

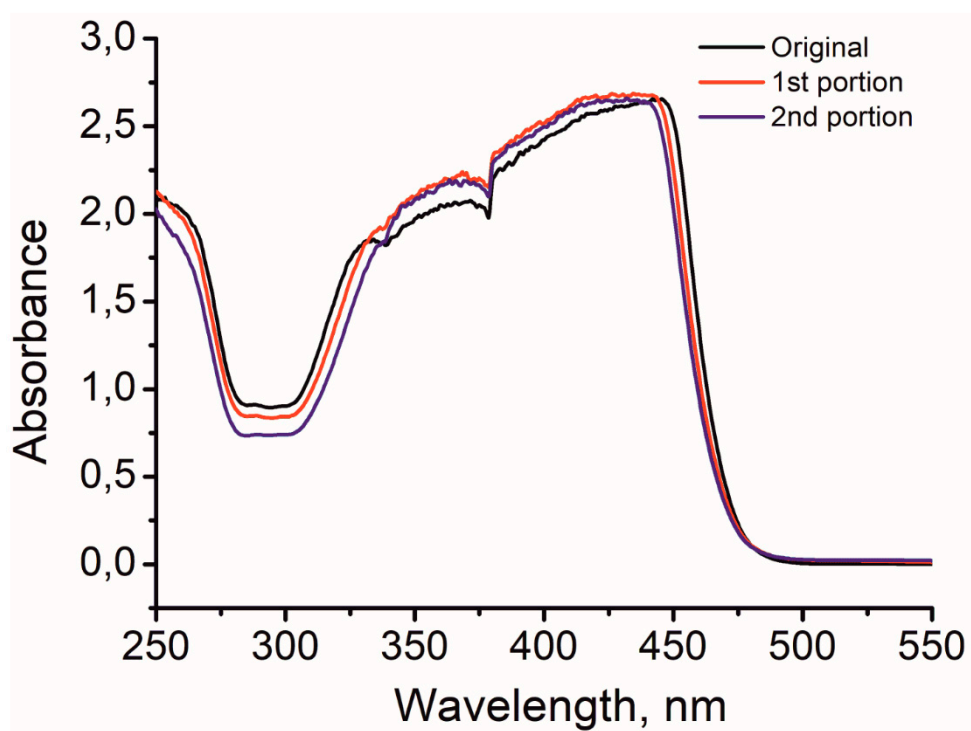

**Figure S5.** The UV-Vis spectra for the control experiment with *rOMC* without  $\text{Ni}^{2+}$ .
